# Supplementary material
Source: publisher site journal article supplement (http://www.degruyter.com/publication/journal_key/MOPP/downloadAsset/MOPP_Procedure_for_Special_Issues.pdf)
Supplement: Supplementary file 1 [file MOPP_Procedure_for_Special_Issues.pdf]

## **Special Issues and Symposia in *Moral Philosophy and Politics***

The standard procedure for guest-edited issues is as follows:

1. The potential guest editor(s) (hereafter referred to as GE) approaches the journal with a proposed topic. Interested guest editors are kindly requested to include a one-page proposal outlining their envisioned special issue. The idea for a special issue may, but need not, arise from an organized workshop, conference, or similar event.
2. The editors assess whether the proposed topic is suitable for the journal.
3. If deemed suitable, the journal requests the GE to prepare a call for papers (CFP), based on the proposal. The CFP should specify a submission deadline set at least six months from the date of its initial circulation. The journal also circulates the CFP. This step is crucial: we do not publish 'closed lists' of papers, and the GE may not restrict who can submit to the special issue. However, the GE is welcome to encourage specific individuals to submit.
4. MOPP does not guarantee the publication of all submitted papers for the special issue. Each paper included in our guest-edited issues must meet the journal's standards of excellence. The submissions undergo our regular double-blind refereeing process, with two distinctive features:
  - The GE may suggest a list of referees. However, the journal is not obliged to use the suggested referees and is free to approach other referees.
  - The GE receives all reports (at least two per submission) and the submissions themselves, both anonymously, and is expected to provide comments on them. The GE may or may not write a separate report on each paper. Finally, the GE offers a recommendation to the editor: accept, minor revisions, major revisions, reject and resubmit, or reject. If the GE requests that their report not be communicated to the author, it will remain confidential.
5. The decision on which papers will be included in the special issue is typically reached through consensus between the GE and the journal's editors. However, if either party (editors or GE) recommends excluding a paper, the recommendation of the dissenting party will be decisive. This means that a GE will never face the situation of having a piece appear in the special issue without their agreement.
6. Once the final versions of the papers are submitted, the GE is expected to write a concise introduction to the special issue.

Submissions should be between 3,000 and 12,000 words in length. Special issues usually comprise five to ten papers. If fewer than five papers, but at least three, successfully pass the refereeing process, the journal publishes a symposium instead of a special issue. If fewer than three papers are accepted, they will be published as regular papers without guest editors.
